# Supplementary material
Source: MDPI journal article supplement (https://www.mdpi.com/2073-445X/10/10/1064)
Supplement: s1 [file s1]

## Supplementary Materials

Table S1. Seed transfer zones (STZs) and populations used in our analyses. Population 133 was removed from all analyses due to low reproductive success. Stages show numbers of individuals that flowered, that lived but did not flower (vegetative), and that died in each population. The last two columns show distances between the nearest and farthest populations sampled within the same STZ.

| STZ    | Population | Flowering | Vegetative | Dead | Elevation<br>(m) | Nearest<br>(km) | Farthest<br>(km) |
|--------|------------|-----------|------------|------|------------------|-----------------|------------------|
| 3a     | 123        | 6         | 5          | 9    | 380              | 54              | 214              |
|        | 133        | 1         | 4          | 15   | 306              | 54              | 169              |
|        | 143        | 12        | 2          | 6    | 294              | 42              | 158              |
|        | 148        | 16        | 2          | 2    | 445              | 42              | 110              |
|        | 160        | 9         | 6          | 5    | 546              | 110             | 214              |
| 4      | 220        | 12        | 1          | 7    | 180              | 25              | 44               |
|        | 224        | 10        | 4          | 6    | 941              | 13              | 31               |
|        | 226        | 15        | 2          | 3    | 1145             | 23              | 38               |
|        | 227        | 11        | 6          | 3    | 1112             | 13              | 30               |
|        | 234        | 14        | 3          | 3    | 800              | 19              | 44               |
| 6a     | 115        | 16        | 1          | 3    | 794              | 106             | 162              |
|        | 134        | 15        | 3          | 2    | 510              | 30              | 56               |
|        | 141        | 19        | 0          | 1    | 487              | 26              | 135              |
|        | 144        | 16        | 3          | 1    | 269              | 26              | 162              |
| 6b     | 118        | 11        | 3          | 6    | 848              | 118             | 171              |
|        | 130        | 13        | 3          | 4    | 754              | 26              | 119              |
|        | 137        | 17        | 1          | 2    | 973              | 13              | 119              |
|        | 140        | 16        | 2          | 2    | 1301             | 13              | 113              |
|        | 147        | 19        | 0          | 1    | 676              | 62              | 171              |
| 7a     | 103        | 19        | 0          | 1    | 891              | 74              | 139              |
|        | 105        | 11        | 1          | 8    | 759              | 36              | 99               |
|        | 229        | 15        | 2          | 3    | 1132             | 32              | 74               |
|        | 236        | 16        | 2          | 2    | 1091             | 5               | 134              |
|        | 237        | 17        | 1          | 2    | 1062             | 5               | 139              |
| 7b     | 114        | 13        | 4          | 3    | 1436             | 19              | 90               |
|        | 119        | 8         | 6          | 6    | 1365             | 19              | 72               |
|        | 126        | 10        | 2          | 8    | 1251             | 28              | 57               |
|        | 132        | 15        | 2          | 3    | 1611             | 9               | 82               |
|        | 136        | 18        | 0          | 2    | 1399             | 9               | 90               |
| Totals |            | 390       | 71         | 119  |                  |                 |                  |

Table S2. BBCH score criteria used to quantify the reproductive phenology of each flower spike. Anthesis was defined as a score between 6.1 and 6.9. Ripening is defined as a score of between 7.5 and 8.1. Dispersal is defined as a score of between 8.1 and 9.0. Scores of 7.0 – 7.4 reflect the fruit development stage (absence of anthers, preceding the development of viable seed) Lastly, optimum harvest is defined as a score between 7.5 and 8.1.

| Stage                    | BBCH<br>Score | Description                                           |
|--------------------------|---------------|-------------------------------------------------------|
| Vegetative               | 0             | Alive with no flowering spikes                        |
|                          | 5             | Alive pre-anthesis                                    |
| Anthesis                 | 6.1           | Anthers visible on 10% spikelets per spike            |
|                          | 6.3           | Anthers visible on 10% - 30% of spikelets per spike   |
|                          | 6.5           | Anthers visible on 30% - 50% of spikelets per spike   |
|                          | 6.8           | Only dried anthers are visible                        |
| Ripening,<br>Development | 7.1           | No anthers visible; green fresh spikelets             |
|                          | 7.3           | No anthers visible; yellowing or browning on spikelet |
| Ripening,<br>Harvest     | 7.5           | No anthers, yellowing or browning and seed swelling   |
|                          | 7.8           | Spikelets yellow or brown and papery; minimal green   |
| Dispersal                | 8.1           | 1-10% of seeds per spike have dispersed               |
|                          | 8.3           | 11-30% of seeds per spike have dispersed              |
|                          | 8.5           | 31-50% of seeds per spike have dispersed              |
|                          | 8.9           | 51-90% of seeds per spike have dispersed              |

**Tables S3a-e.** Same as the phenology heat map for STZ 3a in Table 2, but for STZ 4 (Table S3a), STZ 6a (Table S3b), STZ 6b (Table S3c), STZ 7a (Table S3d), and STZ 7b (Table S3e).

Table S3a. STZ 4

| n=61  | CD          | 2-Jun | 9-Jun | 12-Jun | 16-Jun | 21-Jun | 24-Jun | 28-Jun | 2-Jul | 6-Jul | 10-Jul | 18-Jul | 22-Jul | 26-Jul | 30-Jul | 3-Aug |
|-------|-------------|-------|-------|--------|--------|--------|--------|--------|-------|-------|--------|--------|--------|--------|--------|-------|
| Score | GDD         | 596   | 703   | 723    | 745    | 782    | 812    | 867    | 926   | 973   | 1016   | 1098   | 1138   | 1202   | 1265   | 1309  |
| 6.1   | Anthesis    | 5     | 17    | 0      | 3      | 8      | 1      | 2      | 2     | 0     | 0      | 0      | 1      | 0      | 0      | 0     |
| 6.2   |             | 1     | 6     | 0      | 0      | 1      | 0      | 0      | 0     | 0     | 0      | 0      | 0      | 0      | 0      | 0     |
| 6.3   |             | 1     | 3     | 0      | 0      | 0      | 0      | 1      | 1     | 0     | 0      | 0      | 0      | 0      | 0      | 0     |
| 6.4   |             | 0     | 1     | 0      | 0      | 0      | 0      | 0      | 1     | 0     | 0      | 0      | 0      | 0      | 0      | 0     |
| 6.5   |             | 0     | 0     | 0      | 0      | 3      | 0      | 0      | 1     | 0     | 0      | 0      | 0      | 0      | 0      | 0     |
| 6.6   |             | 0     | 0     | 1      | 0      | 3      | 0      | 0      | 0     | 0     | 0      | 0      | 0      | 0      | 0      | 0     |
| 6.7   |             | 0     | 0     | 0      | 0      | 2      | 1      | 2      | 0     | 0     | 0      | 0      | 0      | 0      | 0      | 0     |
| 6.8   |             | 0     | 0     | 5      | 3      | 7      | 2      | 2      | 0     | 1     | 0      | 0      | 0      | 1      | 0      | 0     |
|       | Sum         | 7     | 27    | 6      | 6      | 24     | 4      | 7      | 5     | 1     | 0      | 0      | 1      | 1      | 0      | 0     |
| 6.9   | Development | 0     | 0     | 0      | 0      | 0      | 0      | 1      | 1     | 1     | 0      | 0      | 0      | 0      | 0      | 0     |
| 7.0   |             | 0     | 0     | 3      | 1      | 0      | 0      | 1      | 0     | 0     | 0      | 0      | 0      | 0      | 0      | 0     |
| 7.1   |             | 0     | 4     | 22     | 26     | 10     | 4      | 2      | 5     | 3     | 2      | 0      | 0      | 0      | 1      | 0     |
| 7.2   |             | 0     | 0     | 0      | 0      | 0      | 4      | 1      | 0     | 1     | 1      | 0      | 0      | 0      | 0      | 0     |
| 7.3   |             | 0     | 0     | 0      | 1      | 6      | 13     | 13     | 1     | 0     | 2      | 0      | 1      | 0      | 0      | 0     |
|       | Sum         | 0     | 4     | 25     | 28     | 16     | 21     | 18     | 7     | 5     | 5      | 0      | 1      | 0      | 1      | 0     |
| 7.4   | Harvest     | 0     | 0     | 0      | 0      | 0      | 5      | 5      | 1     | 0     | 1      | 0      | 0      | 0      | 0      | 0     |
| 7.5   |             | 0     | 0     | 0      | 0      | 0      | 10     | 12     | 24    | 5     | 9      | 5      | 4      | 2      | 0      | 1     |
| 7.6   |             | 0     | 0     | 0      | 0      | 0      | 0      | 0      | 0     | 3     | 2      | 0      | 0      | 1      | 0      | 0     |
| 7.7   |             | 0     | 0     | 0      | 0      | 0      | 0      | 0      | 1     | 1     | 2      | 0      | 1      | 0      | 0      | 0     |
| 7.8   |             | 0     | 0     | 0      | 0      | 0      | 0      | 0      | 9     | 11    | 36     | 9      | 5      | 3      | 1      | 0     |
| 7.9   |             | 0     | 0     | 0      | 0      | 0      | 0      | 0      | 0     | 3     | 0      | 3      | 1      | 0      | 0      | 0     |
| 8.0   |             | 0     | 0     | 0      | 0      | 0      | 0      | 0      | 0     | 5     | 1      | 9      | 0      | 0      | 0      | 1     |
| 8.1   |             | 0     | 0     | 0      | 0      | 0      | 0      | 0      | 0     | 5     | 1      | 13     | 6      | 3      | 2      | 2     |
|       | Sum         | 0     | 0     | 0      | 0      | 0      | 15     | 17     | 35    | 33    | 52     | 39     | 17     | 9      | 3      | 4     |
| 8.2   | Dispersal   | 0     | 0     | 0      | 0      | 0      | 0      | 0      | 0     | 3     | 1      | 5      | 3      | 1      | 2      | 0     |
| 8.3   |             | 0     | 0     | 0      | 0      | 0      | 0      | 0      | 0     | 3     | 1      | 7      | 6      | 2      | 1      | 2     |
| 8.4   |             | 0     | 0     | 0      | 0      | 0      | 0      | 0      | 0     | 2     | 0      | 2      | 0      | 2      | 0      | 0     |
| 8.5   |             | 0     | 0     | 0      | 0      | 0      | 0      | 0      | 0     | 0     | 0      | 1      | 14     | 3      | 2      | 0     |
| 8.6   |             | 0     | 0     | 0      | 0      | 0      | 0      | 0      | 0     | 0     | 0      | 3      | 0      | 1      | 0      | 0     |
| 8.7   |             | 0     | 0     | 0      | 0      | 0      | 0      | 0      | 0     | 0     | 0      | 0      | 0      | 5      | 7      | 5     |
| 8.8   |             | 0     | 0     | 0      | 0      | 0      | 0      | 0      | 0     | 0     | 1      | 0      | 0      | 0      | 2      | 3     |
| 8.9   |             | 0     | 0     | 0      | 0      | 0      | 0      | 0      | 0     | 0     | 0      | 3      | 19     | 36     | 42     | 46    |
|       | Sum         | 0     | 0     | 0      | 0      | 0      | 0      | 0      | 0     | 8     | 3      | 21     | 42     | 50     | 56     | 56    |

Table S3b. STZ 6a.

| n=66  | CD          | 2-Jun | 9-Jun | 12-Jun | 16-Jun | 21-Jun | 24-Jun | 28-Jun | 2-Jul | 6-Jul | 10-Jul | 18-Jul | 22-Jul | 26-Jul | 30-Jul | 3-Aug |
|-------|-------------|-------|-------|--------|--------|--------|--------|--------|-------|-------|--------|--------|--------|--------|--------|-------|
| Score | GDD         | 596   | 703   | 723    | 745    | 782    | 812    | 867    | 926   | 973   | 1016   | 1098   | 1138   | 1202   | 1265   | 1309  |
| 6.1   | Anthesis    | 18    | 14    | 0      | 1      | 6      | 0      | 2      | 0     | 0     | 0      | 0      | 1      | 0      | 0      | 0     |
| 6.2   |             | 7     | 4     | 0      | 0      | 1      | 0      | 0      | 0     | 0     | 0      | 0      | 0      | 0      | 0      | 0     |
| 6.3   |             | 2     | 2     | 0      | 0      | 0      | 0      | 0      | 0     | 0     | 0      | 0      | 0      | 0      | 0      | 0     |
| 6.4   |             | 0     | 2     | 0      | 0      | 0      | 0      | 0      | 1     | 0     | 0      | 0      | 0      | 0      | 0      | 0     |
| 6.5   |             | 0     | 2     | 0      | 0      | 3      | 0      | 0      | 0     | 0     | 0      | 0      | 0      | 0      | 0      | 0     |
| 6.6   |             | 0     | 2     | 0      | 0      | 2      | 1      | 0      | 0     | 0     | 0      | 0      | 0      | 0      | 0      | 0     |
| 6.7   |             | 0     | 1     | 1      | 0      | 1      | 0      | 4      | 0     | 0     | 0      | 0      | 0      | 0      | 0      | 0     |
| 6.8   |             | 0     | 3     | 6      | 2      | 13     | 1      | 4      | 1     | 0     | 0      | 0      | 0      | 0      | 0      | 0     |
|       | Sum         | 27    | 30    | 7      | 3      | 26     | 2      | 10     | 2     | 0     | 0      | 0      | 1      | 0      | 0      | 0     |
| 6.9   | Development | 0     | 1     | 1      | 0      | 0      | 0      | 2      | 3     | 0     | 0      | 0      | 0      | 0      | 0      | 0     |
| 7.0   |             | 0     | 0     | 5      | 2      | 0      | 0      | 3      | 2     | 0     | 0      | 0      | 0      | 0      | 0      | 0     |
| 7.1   |             | 0     | 9     | 27     | 33     | 17     | 7      | 2      | 7     | 1     | 1      | 0      | 0      | 1      | 0      | 0     |
| 7.2   |             | 0     | 0     | 0      | 0      | 1      | 3      | 0      | 1     | 0     | 0      | 0      | 0      | 1      | 0      | 0     |
| 7.3   |             | 0     | 0     | 0      | 4      | 6      | 21     | 12     | 5     | 4     | 7      | 1      | 0      | 0      | 1      | 0     |
|       | Sum         | 0     | 10    | 33     | 39     | 24     | 31     | 19     | 18    | 5     | 8      | 1      | 0      | 2      | 1      | 0     |
| 7.4   | Harvest     | 0     | 0     | 0      | 0      | 0      | 3      | 1      | 0     | 3     | 1      | 1      | 0      | 1      | 0      | 0     |
| 7.5   |             | 0     | 0     | 0      | 0      | 0      | 14     | 20     | 21    | 11    | 17     | 0      | 2      | 0      | 0      | 1     |
| 7.6   |             | 0     | 0     | 0      | 0      | 0      | 0      | 0      | 1     | 8     | 7      | 3      | 2      | 0      | 0      | 0     |
| 7.7   |             | 0     | 0     | 0      | 0      | 0      | 0      | 0      | 0     | 4     | 2      | 2      | 4      | 0      | 0      | 0     |
| 7.8   |             | 0     | 0     | 0      | 0      | 0      | 0      | 0      | 12    | 9     | 28     | 16     | 10     | 3      | 0      | 0     |
| 7.9   |             | 0     | 0     | 0      | 0      | 0      | 0      | 0      | 0     | 2     | 1      | 6      | 0      | 1      | 1      | 1     |
| 8.0   |             | 0     | 0     | 0      | 0      | 0      | 0      | 0      | 0     | 1     | 1      | 11     | 4      | 2      | 1      | 0     |
| 8.1   |             | 0     | 0     | 0      | 0      | 0      | 0      | 0      | 0     | 5     | 0      | 15     | 7      | 2      | 3      | 1     |
|       | Sum         | 0     | 0     | 0      | 0      | 0      | 17     | 21     | 34    | 43    | 57     | 54     | 29     | 9      | 5      | 3     |
| 8.2   | Dispersal   | 0     | 0     | 0      | 0      | 0      | 0      | 0      | 0     | 3     | 1      | 4      | 3      | 2      | 1      | 0     |
| 8.3   |             | 0     | 0     | 0      | 0      | 0      | 0      | 0      | 0     | 2     | 0      | 6      | 3      | 4      | 0      | 1     |
| 8.4   |             | 0     | 0     | 0      | 0      | 0      | 0      | 0      | 0     | 1     | 0      | 0      | 5      | 4      | 1      | 2     |
| 8.5   |             | 0     | 0     | 0      | 0      | 0      | 0      | 0      | 0     | 0     | 0      | 1      | 12     | 7      | 5      | 3     |
| 8.6   |             | 0     | 0     | 0      | 0      | 0      | 0      | 0      | 0     | 0     | 0      | 0      | 0      | 3      | 3      | 6     |
| 8.7   |             | 0     | 0     | 0      | 0      | 0      | 0      | 0      | 0     | 0     | 0      | 0      | 0      | 8      | 12     | 9     |
| 8.8   |             | 0     | 0     | 0      | 0      | 0      | 0      | 0      | 0     | 0     | 0      | 0      | 0      | 2      | 5      | 8     |
| 8.9   |             | 0     | 0     | 0      | 0      | 0      | 0      | 0      | 0     | 0     | 0      | 0      | 13     | 25     | 33     | 34    |
|       | Sum         | 0     | 0     | 0      | 0      | 0      | 0      | 0      | 0     | 6     | 1      | 11     | 36     | 55     | 60     | 63    |

Table S3c. STZ 6b.

| n=78  | CD          | 2-<br>Jun | 9-<br>Jun | 12-<br>Jun | 16-<br>Jun | 21-<br>Jun | 24-<br>Jun | 28-<br>Jun | 2-<br>Jul | 6-<br>Jul | 10-<br>Jul | 18-<br>Jul | 22-<br>Jul | 26-<br>Jul | 30-<br>Jul | 3-<br>Aug |
|-------|-------------|-----------|-----------|------------|------------|------------|------------|------------|-----------|-----------|------------|------------|------------|------------|------------|-----------|
| Score | GDD         | 596       | 703       | 723        | 745        | 782        | 812        | 867        | 926       | 973       | 1016       | 1098       | 1138       | 1202       | 1265       | 1309      |
| 6.1   | Anthesis    | 24        | 26        | 0          | 3          | 12         | 0          | 2          | 1         | 0         | 0          | 0          | 0          | 0          | 0          | 0         |
| 6.2   |             | 7         | 4         | 0          | 0          | 0          | 0          | 0          | 0         | 0         | 0          | 0          | 0          | 0          | 0          | 0         |
| 6.3   |             | 3         | 4         | 0          | 0          | 4          | 1          | 0          | 1         | 0         | 0          | 0          | 0          | 0          | 0          | 0         |
| 6.4   |             | 0         | 1         | 0          | 0          | 1          | 0          | 0          | 0         | 0         | 0          | 0          | 0          | 0          | 0          | 0         |
| 6.5   |             | 0         | 2         | 1          | 0          | 12         | 2          | 2          | 0         | 0         | 0          | 0          | 0          | 0          | 0          | 0         |
| 6.6   |             | 0         | 2         | 0          | 0          | 6          | 0          | 1          | 0         | 0         | 0          | 0          | 0          | 0          | 0          | 0         |
| 6.7   |             | 0         | 1         | 0          | 0          | 9          | 1          | 5          | 0         | 0         | 0          | 0          | 0          | 0          | 0          | 0         |
| 6.8   |             | 0         | 2         | 6          | 2          | 7          | 2          | 6          | 4         | 1         | 0          | 0          | 0          | 0          | 0          | 0         |
|       | Sum         | 34        | 42        | 7          | 5          | 51         | 6          | 16         | 6         | 1         | 0          | 0          | 0          | 0          | 0          | 0         |
| 6.9   | Development | 0         | 1         | 1          | 0          | 1          | 0          | 5          | 1         | 0         | 0          | 0          | 0          | 0          | 0          | 0         |
| 7.0   |             | 0         | 2         | 8          | 2          | 1          | 3          | 3          | 3         | 0         | 0          | 0          | 0          | 0          | 0          | 0         |
| 7.1   |             | 0         | 10        | 35         | 47         | 8          | 13         | 5          | 5         | 1         | 2          | 0          | 0          | 1          | 0          | 0         |
| 7.2   |             | 0         | 0         | 1          | 1          | 1          | 10         | 0          | 4         | 0         | 2          | 0          | 0          | 1          | 0          | 0         |
| 7.3   |             | 0         | 0         | 0          | 2          | 6          | 20         | 13         | 8         | 5         | 6          | 1          | 2          | 1          | 0          | 0         |
|       | Sum         | 0         | 13        | 45         | 52         | 17         | 46         | 26         | 21        | 6         | 10         | 1          | 2          | 3          | 0          | 0         |
| 7.4   | Harvest     | 0         | 0         | 0          | 0          | 0          | 7          | 8          | 7         | 5         | 4          | 0          | 0          | 0          | 0          | 0         |
| 7.5   |             | 0         | 0         | 0          | 0          | 0          | 10         | 15         | 16        | 17        | 14         | 6          | 4          | 3          | 1          | 0         |
| 7.6   |             | 0         | 0         | 0          | 0          | 0          | 0          | 0          | 4         | 9         | 9          | 3          | 2          | 1          | 0          | 0         |
| 7.7   |             | 0         | 0         | 0          | 0          | 0          | 0          | 1          | 4         | 8         | 9          | 4          | 4          | 1          | 0          | 0         |
| 7.8   |             | 0         | 0         | 0          | 0          | 0          | 0          | 1          | 16        | 3         | 19         | 12         | 10         | 2          | 3          | 1         |
| 7.9   |             | 0         | 0         | 0          | 0          | 0          | 0          | 0          | 0         | 3         | 0          | 7          | 1          | 0          | 0          | 0         |
| 8.0   |             | 0         | 0         | 0          | 0          | 0          | 0          | 0          | 0         | 2         | 3          | 10         | 6          | 2          | 1          | 0         |
| 8.1   |             | 0         | 0         | 0          | 0          | 0          | 0          | 0          | 0         | 5         | 3          | 6          | 5          | 6          | 2          | 3         |
|       | Sum         | 0         | 0         | 0          | 0          | 0          | 17         | 25         | 47        | 52        | 61         | 48         | 32         | 15         | 7          | 4         |
| 8.2   | Dispersal   | 0         | 0         | 0          | 0          | 0          | 0          | 0          | 0         | 4         | 1          | 4          | 6          | 3          | 1          | 0         |
| 8.3   |             | 0         | 0         | 0          | 0          | 0          | 0          | 0          | 0         | 4         | 2          | 8          | 3          | 6          | 3          | 2         |
| 8.4   |             | 0         | 0         | 0          | 0          | 0          | 0          | 0          | 0         | 2         | 0          | 5          | 6          | 6          | 5          | 4         |
| 8.5   |             | 0         | 0         | 0          | 0          | 0          | 0          | 0          | 0         | 2         | 1          | 3          | 4          | 3          | 2          | 2         |
| 8.6   |             | 0         | 0         | 0          | 0          | 0          | 0          | 0          | 0         | 0         | 1          | 1          | 0          | 2          | 5          | 5         |
| 8.7   |             | 0         | 0         | 0          | 0          | 0          | 0          | 0          | 0         | 1         | 0          | 3          | 3          | 3          | 10         | 8         |
| 8.8   |             | 0         | 0         | 0          | 0          | 0          | 0          | 0          | 0         | 0         | 1          | 1          | 1          | 4          | 6          | 8         |
| 8.9   |             | 0         | 0         | 0          | 0          | 0          | 0          | 0          | 0         | 1         | 1          | 4          | 20         | 32         | 38         | 43        |
|       | Sum         | 0         | 0         | 0          | 0          | 0          | 0          | 0          | 0         | 14        | 7          | 29         | 43         | 59         | 70         | 72        |

Table S3d. STZ 7a.

| n=78  | CD          | 2-Jun | 9-Jun | 12-Jun | 16-Jun | 21-Jun | 24-Jun | 28-Jun | 2-Jul | 6-Jul | 10-Jul | 18-Jul | 22-Jul | 26-Jul | 30-Jul | 3-Aug |
|-------|-------------|-------|-------|--------|--------|--------|--------|--------|-------|-------|--------|--------|--------|--------|--------|-------|
| Score | GDD         | 596   | 703   | 723    | 745    | 782    | 812    | 867    | 926   | 973   | 1016   | 1098   | 1138   | 1202   | 1265   | 1309  |
| 6.1   | Anthesis    | 11    | 9     | 0      | 0      | 10     | 0      | 3      | 1     | 0     | 0      | 0      | 1      | 0      | 0      | 0     |
| 6.2   |             | 3     | 12    | 0      | 0      | 2      | 0      | 0      | 0     | 0     | 0      | 0      | 0      | 0      | 0      | 0     |
| 6.3   |             | 0     | 5     | 0      | 0      | 0      | 0      | 0      | 0     | 0     | 0      | 0      | 0      | 0      | 0      | 0     |
| 6.4   |             | 0     | 1     | 0      | 0      | 0      | 0      | 0      | 0     | 0     | 0      | 0      | 0      | 0      | 0      | 0     |
| 6.5   |             | 0     | 0     | 1      | 0      | 2      | 0      | 0      | 0     | 0     | 0      | 0      | 0      | 0      | 0      | 0     |
| 6.6   |             | 0     | 0     | 0      | 1      | 0      | 0      | 2      | 0     | 0     | 0      | 0      | 0      | 0      | 0      | 0     |
| 6.7   |             | 0     | 0     | 0      | 0      | 1      | 0      | 3      | 0     | 0     | 0      | 0      | 0      | 0      | 0      | 0     |
| 6.8   |             | 0     | 0     | 2      | 1      | 3      | 1      | 2      | 0     | 1     | 0      | 0      | 0      | 0      | 0      | 0     |
|       | Sum         | 14    | 27    | 3      | 2      | 18     | 1      | 10     | 1     | 1     | 0      | 0      | 1      | 0      | 0      | 0     |
| 6.9   | Development | 0     | 1     | 3      | 0      | 0      | 0      | 0      | 2     | 0     | 0      | 0      | 0      | 0      | 0      | 0     |
| 7.0   |             | 0     | 0     | 1      | 2      | 0      | 0      | 2      | 0     | 0     | 0      | 0      | 0      | 0      | 0      | 0     |
| 7.1   |             | 0     | 4     | 23     | 23     | 10     | 9      | 2      | 1     | 2     | 1      | 0      | 0      | 1      | 1      | 1     |
| 7.2   |             | 0     | 0     | 0      | 1      | 0      | 2      | 1      | 2     | 0     | 0      | 0      | 0      | 0      | 0      | 0     |
| 7.3   |             | 0     | 0     | 0      | 2      | 13     | 14     | 7      | 5     | 4     | 4      | 1      | 0      | 0      | 0      | 0     |
|       | Sum         | 0     | 5     | 27     | 28     | 23     | 25     | 12     | 10    | 6     | 5      | 1      | 0      | 1      | 1      | 1     |
| 7.4   | Harvest     | 0     | 0     | 0      | 0      | 0      | 1      | 1      | 4     | 2     | 1      | 0      | 0      | 1      | 0      | 0     |
| 7.5   |             | 0     | 0     | 0      | 0      | 0      | 15     | 22     | 16    | 5     | 10     | 1      | 1      | 0      | 0      | 0     |
| 7.6   |             | 0     | 0     | 0      | 0      | 0      | 0      | 0      | 0     | 3     | 4      | 1      | 0      | 0      | 0      | 0     |
| 7.7   |             | 0     | 0     | 0      | 0      | 0      | 0      | 0      | 1     | 2     | 3      | 3      | 2      | 0      | 0      | 0     |
| 7.8   |             | 0     | 0     | 0      | 0      | 0      | 0      | 0      | 12    | 11    | 48     | 6      | 5      | 2      | 0      | 0     |
| 7.9   |             | 0     | 0     | 0      | 0      | 0      | 0      | 0      | 0     | 2     | 3      | 9      | 2      | 0      | 0      | 0     |
| 8.0   |             | 0     | 0     | 0      | 0      | 0      | 0      | 0      | 0     | 4     | 0      | 6      | 2      | 0      | 1      | 1     |
| 8.1   |             | 0     | 0     | 0      | 0      | 0      | 0      | 0      | 0     | 7     | 2      | 25     | 7      | 2      | 0      | 0     |
|       | Sum         | 0     | 0     | 0      | 0      | 0      | 16     | 23     | 33    | 36    | 71     | 51     | 19     | 5      | 1      | 1     |
| 8.2   | Dispersal   | 0     | 0     | 0      | 0      | 0      | 0      | 0      | 0     | 1     | 0      | 9      | 0      | 1      | 0      | 0     |
| 8.3   |             | 0     | 0     | 0      | 0      | 0      | 0      | 0      | 0     | 1     | 0      | 4      | 4      | 3      | 1      | 0     |
| 8.4   |             | 0     | 0     | 0      | 0      | 0      | 0      | 0      | 0     | 0     | 0      | 2      | 1      | 0      | 2      | 2     |
| 8.5   |             | 0     | 0     | 0      | 0      | 0      | 0      | 0      | 0     | 0     | 0      | 5      | 22     | 4      | 0      | 1     |
| 8.6   |             | 0     | 0     | 0      | 0      | 0      | 0      | 0      | 0     | 0     | 1      | 2      | 1      | 0      | 1      | 0     |
| 8.7   |             | 0     | 0     | 0      | 0      | 0      | 0      | 0      | 0     | 0     | 0      | 1      | 2      | 14     | 15     | 16    |
| 8.8   |             | 0     | 0     | 0      | 0      | 0      | 0      | 0      | 0     | 0     | 0      | 0      | 0      | 2      | 2      | 1     |
| 8.9   |             | 0     | 0     | 0      | 0      | 0      | 0      | 0      | 0     | 0     | 0      | 2      | 28     | 48     | 55     | 56    |
|       | Sum         | 0     | 0     | 0      | 0      | 0      | 0      | 0      | 0     | 2     | 1      | 25     | 58     | 72     | 76     | 76    |

Table S3e. STZ 7b.

| n=65  | CD          | 2-Jun | 9-Jun | 12-Jun | 16-Jun | 21-Jun | 24-Jun | 28-Jun | 2-Jul | 6-Jul | 10-Jul | 18-Jul | 22-Jul | 26-Jul | 30-Jul | 3-Aug |
|-------|-------------|-------|-------|--------|--------|--------|--------|--------|-------|-------|--------|--------|--------|--------|--------|-------|
| Score | GDD         | 596   | 703   | 723    | 745    | 782    | 812    | 867    | 926   | 973   | 1016   | 1098   | 1138   | 1202   | 1265   | 1309  |
| 6.1   | Anthesis    | 13    | 11    | 0      | 2      | 7      | 0      | 8      | 5     | 0     | 1      | 0      | 4      | 0      | 0      | 0     |
| 6.2   |             | 1     | 6     | 0      | 0      | 3      | 0      | 0      | 0     | 0     | 0      | 0      | 0      | 0      | 0      | 0     |
| 6.3   |             | 1     | 1     | 0      | 1      | 3      | 0      | 2      | 4     | 0     | 0      | 0      | 0      | 1      | 1      | 1     |
| 6.4   |             | 0     | 3     | 0      | 0      | 4      | 0      | 1      | 1     | 0     | 0      | 0      | 0      | 0      | 0      | 0     |
| 6.5   |             | 0     | 1     | 3      | 0      | 4      | 2      | 2      | 0     | 2     | 0      | 0      | 0      | 0      | 0      | 0     |
| 6.6   |             | 0     | 2     | 0      | 0      | 3      | 0      | 2      | 0     | 0     | 0      | 0      | 1      | 0      | 0      | 0     |
| 6.7   |             | 0     | 0     | 0      | 0      | 4      | 0      | 3      | 2     | 1     | 1      | 0      | 1      | 1      | 0      | 0     |
| 6.8   |             | 0     | 0     | 2      | 6      | 7      | 4      | 8      | 3     | 2     | 1      | 1      | 1      | 2      | 3      | 2     |
|       | Sum         | 15    | 24    | 5      | 9      | 35     | 6      | 26     | 15    | 5     | 3      | 1      | 7      | 4      | 4      | 3     |
| 6.9   | Development | 0     | 1     | 1      | 0      | 0      | 0      | 3      | 1     | 0     | 0      | 0      | 0      | 1      | 0      | 0     |
| 7.0   |             | 0     | 1     | 3      | 0      | 0      | 2      | 5      | 6     | 2     | 1      | 0      | 0      | 2      | 0      | 0     |
| 7.1   |             | 0     | 4     | 19     | 20     | 4      | 8      | 3      | 6     | 9     | 13     | 1      | 4      | 5      | 1      | 1     |
| 7.2   |             | 0     | 0     | 0      | 1      | 0      | 6      | 1      | 4     | 2     | 0      | 1      | 0      | 0      | 0      | 0     |
| 7.3   |             | 0     | 0     | 0      | 1      | 2      | 13     | 5      | 9     | 5     | 8      | 5      | 6      | 2      | 2      | 0     |
|       | Sum         | 0     | 6     | 23     | 22     | 6      | 29     | 17     | 26    | 18    | 22     | 7      | 10     | 10     | 3      | 1     |
| 7.4   | Harvest     | 0     | 0     | 0      | 0      | 0      | 1      | 2      | 6     | 5     | 7      | 2      | 3      | 0      | 1      | 0     |
| 7.5   |             | 0     | 0     | 0      | 0      | 0      | 4      | 5      | 5     | 12    | 10     | 10     | 5      | 6      | 3      | 1     |
| 7.6   |             | 0     | 0     | 0      | 0      | 0      | 0      | 0      | 1     | 6     | 8      | 3      | 2      | 0      | 3      | 1     |
| 7.7   |             | 0     | 0     | 0      | 0      | 0      | 0      | 0      | 1     | 2     | 3      | 7      | 0      | 0      | 0      | 2     |
| 7.8   |             | 0     | 0     | 0      | 0      | 0      | 0      | 0      | 4     | 4     | 9      | 8      | 4      | 8      | 2      | 3     |
| 7.9   |             | 0     | 0     | 0      | 0      | 0      | 0      | 0      | 0     | 3     | 0      | 5      | 3      | 1      | 0      | 1     |
| 8.0   |             | 0     | 0     | 0      | 0      | 0      | 0      | 0      | 0     | 0     | 0      | 7      | 9      | 2      | 0      | 0     |
| 8.1   |             | 0     | 0     | 0      | 0      | 0      | 0      | 0      | 0     | 3     | 0      | 8      | 1      | 3      | 4      | 4     |
|       | Sum         | 0     | 0     | 0      | 0      | 0      | 5      | 7      | 17    | 35    | 37     | 50     | 27     | 20     | 13     | 12    |
| 8.2   | Dispersal   | 0     | 0     | 0      | 0      | 0      | 0      | 0      | 0     | 0     | 0      | 1      | 2      | 3      | 3      | 4     |
| 8.3   |             | 0     | 0     | 0      | 0      | 0      | 0      | 0      | 0     | 0     | 0      | 1      | 1      | 3      | 4      | 2     |
| 8.4   |             | 0     | 0     | 0      | 0      | 0      | 0      | 0      | 0     | 0     | 0      | 2      | 1      | 2      | 5      | 3     |
| 8.5   |             | 0     | 0     | 0      | 0      | 0      | 0      | 0      | 0     | 0     | 0      | 0      | 9      | 4      | 2      | 7     |
| 8.6   |             | 0     | 0     | 0      | 0      | 0      | 0      | 0      | 0     | 0     | 0      | 0      | 1      | 4      | 4      | 3     |
| 8.7   |             | 0     | 0     | 0      | 0      | 0      | 0      | 0      | 0     | 0     | 0      | 0      | 2      | 2      | 3      | 4     |
| 8.8   |             | 0     | 0     | 0      | 0      | 0      | 0      | 0      | 0     | 0     | 0      | 0      | 0      | 1      | 3      | 3     |
| 8.9   |             | 0     | 0     | 0      | 0      | 0      | 0      | 0      | 0     | 0     | 0      | 0      | 4      | 12     | 21     | 22    |
|       | Sum         | 0     | 0     | 0      | 0      | 0      | 0      | 0      | 0     | 0     | 0      | 4      | 20     | 31     | 45     | 48    |
